# Supplementary material
Source: publisher figshare collection journal article supplement (https://gsajournals.figshare.com/ndownloader/files/18042923)
Supplement: Supplementary file 1 [file 18042923]

Supplemental Table and File listing:

File S2: Listing of accession numbers for all sequences generated or used in this work.

Figure S1: K-mer coverage vs GC count of MSEV gene containing scaffolds vs non-containing scaffolds

Table S1: *Lh* MSEV protein analysis (See Table_S1.xlsx)
- Contains annotations, presence/absence of signal peptide and transmembrane domain, and presence/absence of equivalent transcript in *L. boulardi* or *G. hookeri* of MSEV proteins described in this work

Table S2: *Lh* MSEV BLASTp results (See Table_S2.xlsx)
- Contains results of BLASTp searches of MSEV proteome against PDV, Viridae, and nr databases.

Table S3: BUSCO Assessment (See Table_S3.xlsx)
- Contains listings of all BUSCOs found in male and female genomes.
